# Supplementary material
Source: PubMed Central journal article supplement (PMC7963551)
Supplement: 15-01015.pdf [file 15-01015.pdf]

**On-line Table: Baseline demographics and aneurysm characteristics of patient groups**

| Variable                         | Current Smoker   | Previous Smoker  | Never Smoker     | Total            | P Value           |
|----------------------------------|------------------|------------------|------------------|------------------|-------------------|
| Baseline demographics            |                  |                  |                  |                  |                   |
| No. of patients                  | 179 (29.1%)      | 111 (18.0%)      | 326 (52.9%)      | 616              |                   |
| Age (yr)                         |                  |                  |                  |                  | .066              |
| Mean (No.)                       | 56.3 ± 10.8      | 58.6 ± 13.8      | 57.6 ± 15.9      | 57.4 ± 14.2      |                   |
| Median (range)                   | 57.0 (24.0–81.0) | 61.0 (24.0–86.0) | 61.0 (3.0–89.0)  | 59.3 (3.0–89.0)  |                   |
| Sex                              |                  |                  |                  |                  | .848              |
| Male                             | 15.6% (28/179)   | 18.0% (20/111)   | 17.2% (56/326)   | 16.9% (104/616)  |                   |
| Female                           | 84.4% (151/179)  | 82.0% (91/111)   | 82.8% (270/326)  | 83.1% (512/616)  |                   |
| Aneurysm characteristics         |                  |                  |                  |                  |                   |
| No. of aneurysms                 | 214 (30.8%)      | 120 (17.3%)      | 360 (51.9%)      | 694              |                   |
| Aneurysm size (mm)               |                  |                  |                  |                  | .005 <sup>a</sup> |
| Mean (No.)                       | 11.2 ± 7.1 (213) | 13.4 ± 7.6 (119) | 13.2 ± 8.1 (356) | 12.6 ± 7.8 (688) |                   |
| Median (range)                   | 10.0 (0.9–32.6)  | 12.0 (1.2–36.1)  | 11.0 (1.0–45.0)  | 11.0 (0.9–45.0)  |                   |
| Aneurysm size                    |                  |                  |                  |                  | .036 <sup>a</sup> |
| Small                            | 40.4% (86/213)   | 23.5% (28/119)   | 32.3% (115/356)  | 33.3% (229/688)  |                   |
| Large                            | 49.8% (106/213)  | 65.5% (78/119)   | 57.0% (203/356)  | 56.3% (387/688)  |                   |
| Giant                            | 9.9% (21/213)    | 10.9% (13/119)   | 10.7% (38/356)   | 10.5% (72/688)   |                   |
| Aneurysm type                    |                  |                  |                  |                  | .074              |
| Saccular                         | 73.4% (157/214)  | 71.7% (86/120)   | 73.1% (263/360)  | 72.9% (506/694)  |                   |
| Fusiform                         | 17.3% (37/214)   | 22.5% (27/120)   | 19.7% (71/360)   | 19.5% (135/694)  |                   |
| Dissecting                       | 4.2% (9/214)     | 3.3% (4/120)     | 3.1% (11/360)    | 3.5% (24/694)    |                   |
| Other                            | 5.1% (11/214)    | 2.5% (3/120)     | 4.2% (15/360)    | 4.2% (29/694)    |                   |
| Aneurysm location                |                  |                  |                  |                  | .054              |
| ICA                              | 78.0% (167/214)  | 82.5% (99/120)   | 84.7% (305/360)  | 82.3% (571/694)  |                   |
| MCA                              | 5.1% (11/214)    | 2.5% (3/120)     | 3.3% (12/360)    | 3.7% (26/694)    |                   |
| PCA                              | 2.8% (6/214)     | 0.0% (0/120)     | 0.3% (1/360)     | 1.0% (7/694)     |                   |
| BA                               | 3.3% (7/214)     | 5.0% (6/120)     | 4.4% (16/360)    | 4.2% (29/694)    |                   |
| Other                            | 10.7% (23/214)   | 10.0% (12/120)   | 7.2% (26/360)    | 8.8% (61/694)    |                   |
| Presented with ruptured aneurysm | 3.7% (8/214)     | 4.2% (5/120)     | 5.6% (20/360)    | 4.8% (33/694)    | .580              |
| Multiple PEDs used               | 31.0% (66/213)   | 44.5% (53/119)   | 41.8% (150/359)  | 38.9% (269/691)  | .015 <sup>a</sup> |

**Note:**—PCA indicates posterior cerebral artery; BA, basilar artery.

<sup>a</sup> Significant.
